# Supplementary material for: Nitrogen-doped carbon coated Li4Ti5O12–TiO2/Sn nanowires and their enhanced electrochemical properties for lithium ion batteries
Source: Royal Society of Chemistry journal article supplement (doi:10.1039/c6ta03847f), 2016-01-01
Supplement: c6ta03847f1.pdf [file c6ta03847f1.pdf]

## Electronic Supplementary Information

### Nitrogen-Doped Carbon Coated $\text{Li}_4\text{Ti}_5\text{O}_{12}$ - $\text{TiO}_2$ /Sn Nanowire and Its Enhanced Electrochemical Property for Lithium ion Batteries

Shitong Wang,<sup>a</sup> Yong Yang,<sup>b</sup> Caihua Jiang,<sup>a</sup> Ye Hong,<sup>a</sup> Wei Quan,<sup>a</sup> Zhongtai Zhang<sup>a</sup> and Zilong Tang<sup>\*a</sup>

<sup>a</sup> *State Key Lab of New Ceramics and Fine Processing, School of Materials Science and Engineering,  
Tsinghua University, Beijing 100084, P. R. China.*

<sup>b</sup> *Department of Chemistry, Tsinghua University, Beijing 100084, P. R. China.*

\* Correspondence to: Z.L.T. (Email: [tzl@tsinghua.edu.cn](mailto:tzl@tsinghua.edu.cn)).

#### Contents:

Experimental details

Fig.S1-Fig.S7

Table S1

References (S1-S13)

## Experimental details

### Synthesis of $\text{Li}_4\text{Ti}_5\text{O}_{12}\text{-TiO}_2$ , $\text{Li}_4\text{Ti}_5\text{O}_{12}\text{-TiO}_2/\text{Sn}$ and $\text{Li}_4\text{Ti}_5\text{O}_{12}\text{-TiO}_2/\text{Sn}@C$

First, hydrogen titanate nanowire precursor was prepared via hydrothermal reaction between anatase  $\text{TiO}_2$  powders and concentrated NaOH solution (10 M) at 180 °C for 48 h, following the ion substitution progress of  $\text{Na}^+$  with  $\text{H}^+$  in 0.5 M  $\text{HNO}_3$  solution. Second,  $\text{Li}_{1.81}\text{H}_{0.19}\text{Ti}_2\text{O}_5 \cdot x\text{H}_2\text{O}/\text{SnO}_2$  precursor was obtained by chemical lithiation of hydrogen titanate precursor and hydrolysis process of  $\text{SnCl}_4 \cdot 5\text{H}_2\text{O}$  in a 0.2 M LiOH solution heated at 180 °C for 2 h in a Teflon-lined stainless steel autoclave. Thirdly, 0.2 g  $\text{Li}_{1.81}\text{H}_{0.19}\text{Ti}_2\text{O}_5 \cdot x\text{H}_2\text{O}/\text{SnO}_2$  mixed with certain amounts of dopamine hydrochloride were added to the tris-buffer (200 mL, pH  $\approx$ 8.5) and stirred for 24 h at room temperature. Finally the precipitate was collected, and after drying it was annealed under an Ar/ $\text{H}_2$  (95%:5% Vol) atmosphere at 600 °C for 6 h. For comparison, the  $\text{Li}_4\text{Ti}_5\text{O}_{12}\text{-TiO}_2$  and  $\text{Li}_4\text{Ti}_5\text{O}_{12}\text{-TiO}_2/\text{Sn}$  samples were prepared by heating  $\text{Li}_{1.81}\text{H}_{0.19}\text{Ti}_2\text{O}_5 \cdot x\text{H}_2\text{O}$  and  $\text{Li}_{1.81}\text{H}_{0.19}\text{Ti}_2\text{O}_5 \cdot x\text{H}_2\text{O}/\text{SnO}_2$  precursors respectively, and keeping the other heating experimental variables fixed. Besides, we also synthesized the  $\text{Li}_4\text{Ti}_5\text{O}_{12}\text{-TiO}_2\text{-NWs}@C$  and  $\text{Sn}@C$  electrodes using the same hydrolysis and coating processes as contrasts shown in ESI.

### Material Characterizations

The morphology, size and crystal structure of the as-prepared samples were characterized by MERLIN VP Compact for scanning electron microscope (SEM), Hitachi-HT7700 for TEM, and JEM-2100F for high resolution transmission electron microscopy (HRTEM), selected-area electron diffraction (SAED) and EDS mapping. X-ray diffraction (XRD) was recorded on a Rigaku D/Max-B X with Cu K $\alpha$  radiation ( $\lambda = 1.5418 \text{ \AA}$ ). The Raman spectrum was recorded on a HR800 Raman spectrometer (HORIBA, France) using the 488 nm line of an ArC laser as the excitation beam at a heating rate of 2 °C  $\text{min}^{-1}$ . Inductively coupled plasma mass spectroscopy (ICP-MS) analysis was carried out using iCP QC (Thermo Fisher Scientific, US) to determine the content of Sn, and elemental analyzer (CE-440) was used for nitrogen content. Thermogravimetric analysis (TGA) was carried out using thermogravimetric analyzer (NETZSCH-STA 449 F3) with a heating rate of 10 °C/min in air. Nitrogen adsorption–desorption isotherms were obtained using an Automated vapor sorption analyzer (Autosorb-iQ2-MP, Quanta Chrome) at 77.4 K under vacuum. The specific surface area was calculated by the Brunauer-Emmett-Teller (BET) method. X-ray photoelectron

spectroscopy (XPS) spectra data were obtained using Escalab 250XI system (Thermo Fisher Scientific, US).

### **Electrochemical investigation**

For the electrochemical measurements, the as-prepared active materials were mixed with polyvinylidene fluoride (PVDF) and Super P in a weight ratio of 80:10:10 in N-methyl-2-pyrrolidone (NMP) solution. The mixed materials were pasted on aluminum foils and dried in a vacuum oven at 100 °C for 10 h, and then were cut into discs and pressed as working electrodes (WE). The 2032-coin-type cells were assembled in an argon-filled glove-box. Pure lithium was used as the counter electrode. The electrolyte was 1 M LiPF<sub>6</sub> ethylene carbonate (EC): dimethylcarbonate (DMC) =1:1 in volume. The separator was a microporous membrane (Celguard 2400, USA). The mass loadings of all the electrodes in this work are controlled between 1.0-1.2 mg cm<sup>-2</sup>. The discharge/charge tests were carried out using a LAND Cell test 2001 A (Wuhan, China) system between 2.5 and 1.0 V. Zahner IM6 electrochemical workstation was used for cyclic voltammetry (CV) with the scan scope of 1.00-2.50 V. All the electrochemical tests were conducted at room temperature.

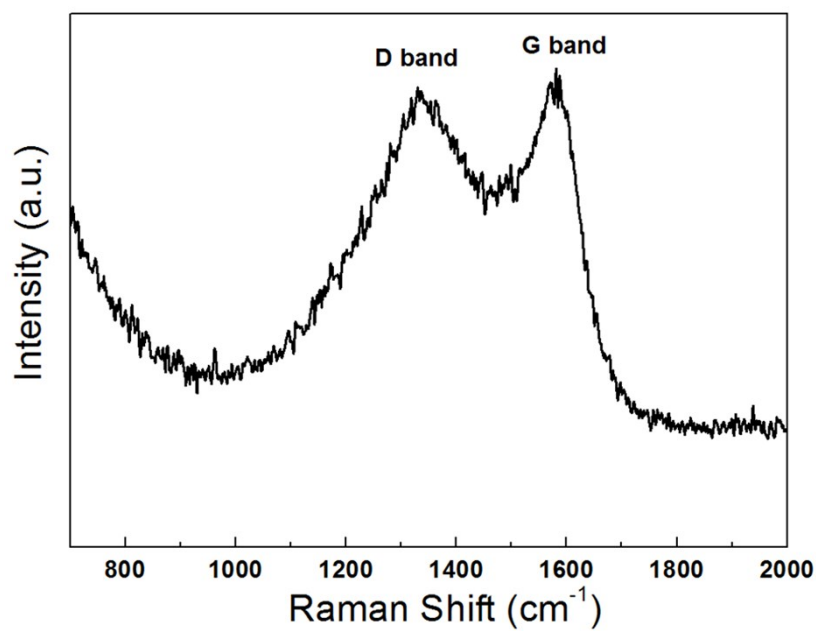

**Figure S1.** Raman spectrum of the LTO-TO-NWs/Sn@C composite.

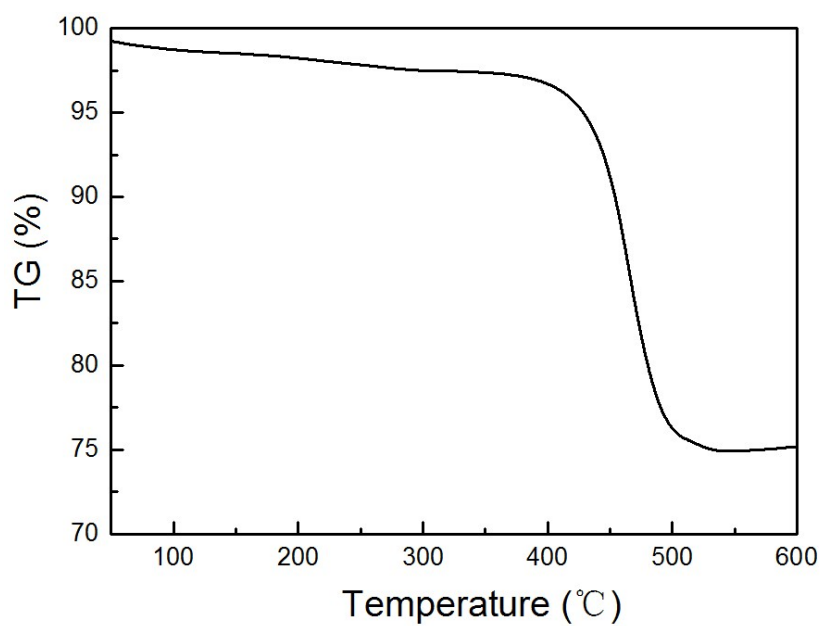

**Figure S2.** Thermogravimetric analysis (TGA) of the LTO-TO-NWs/Sn@C composite in air.

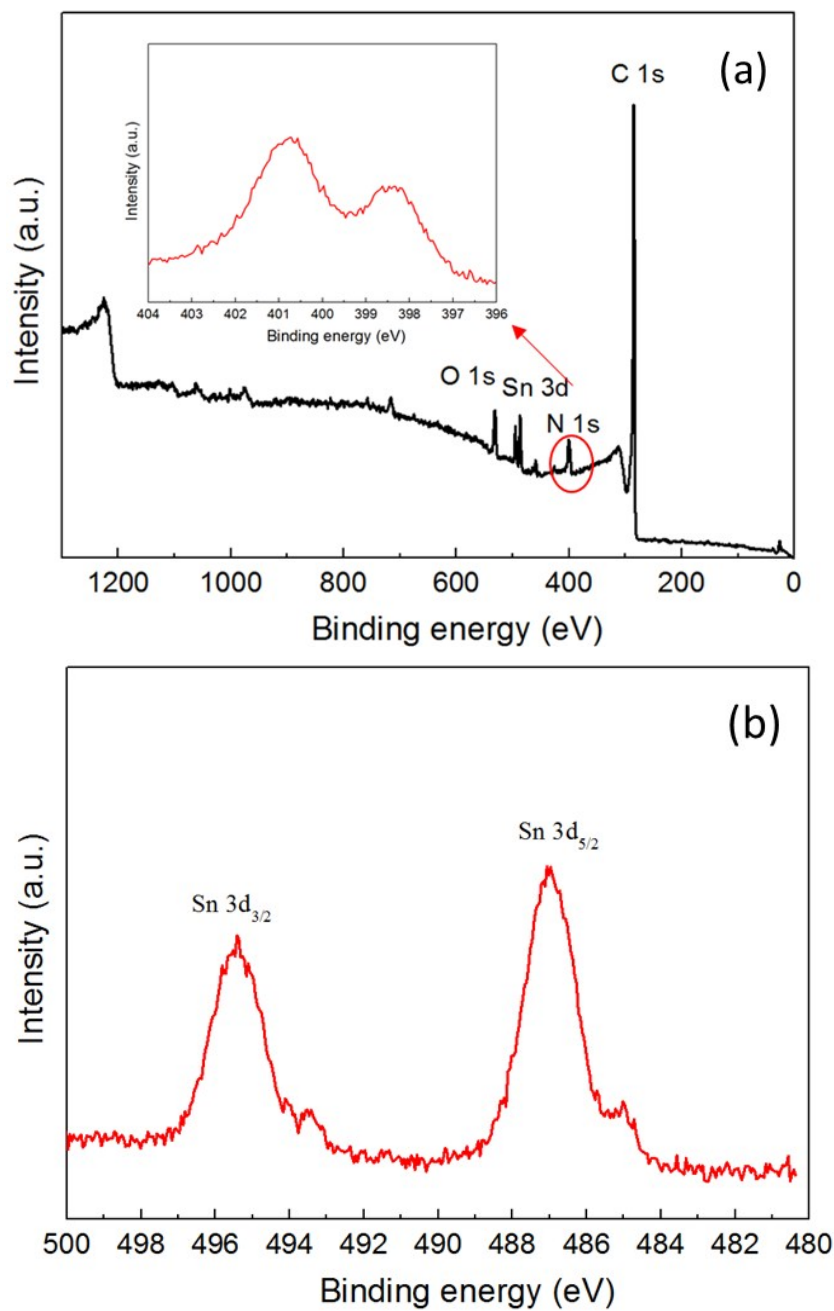

**Figure S3.** (a) The full XPS spectrum of LTO-TO-NWs/Sn@C composite. The inset shows the N1s spectrum of LTO-TO-NWs/Sn@C composite. (b) Sn 3d XPS spectra of as-prepared LTO-TO-NWs/Sn@C composite. Note that Sn<sup>4+</sup> signal in Fig. S3(b) is that some Sn NPs near the surface of the carbon layer were oxidized to SnO<sub>2</sub>.

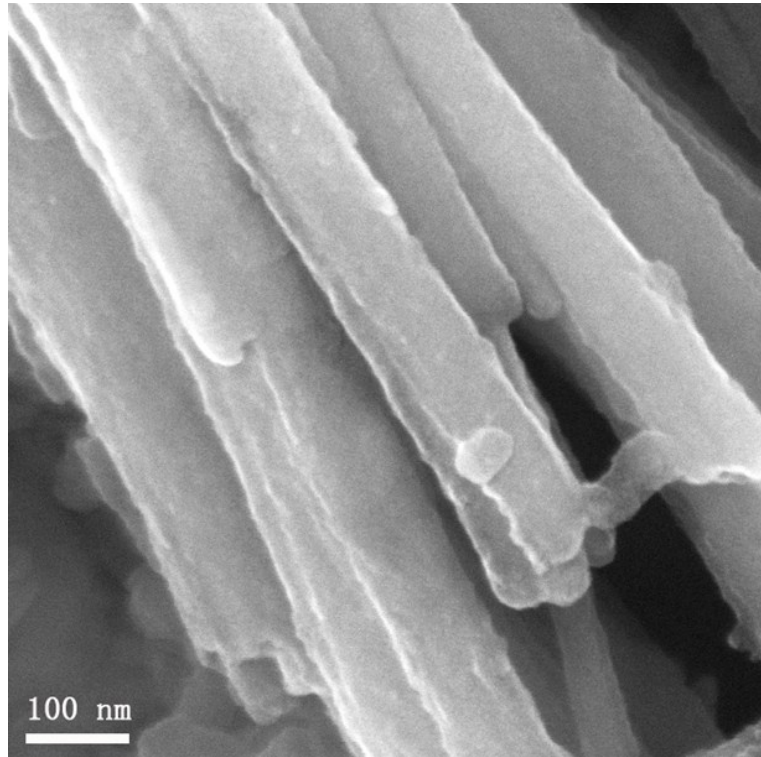

**Figure S4.** SEM image of LTO-TO-NWs/Sn@C composite.

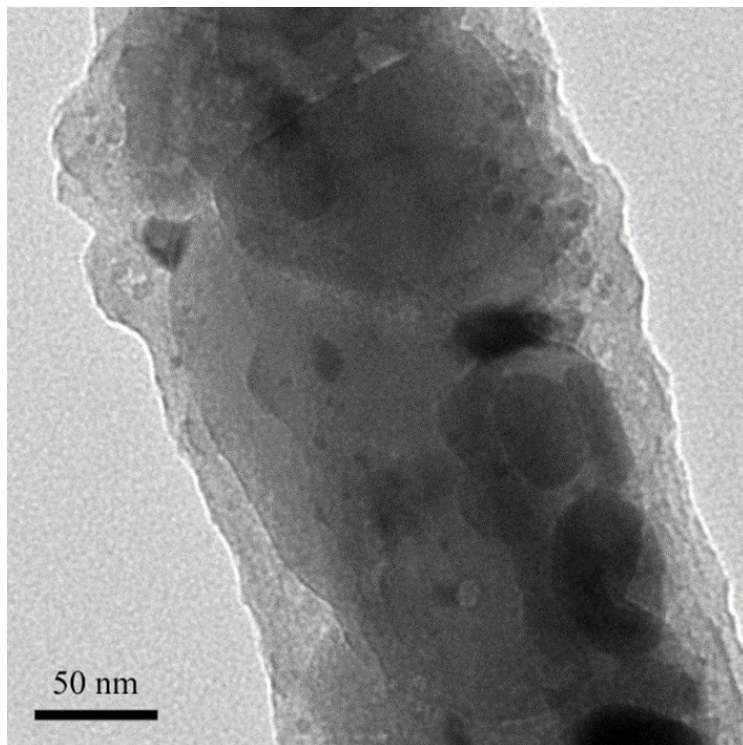

**Figure S5.** TEM image of LTO-TO-NWs/Sn@C composite.

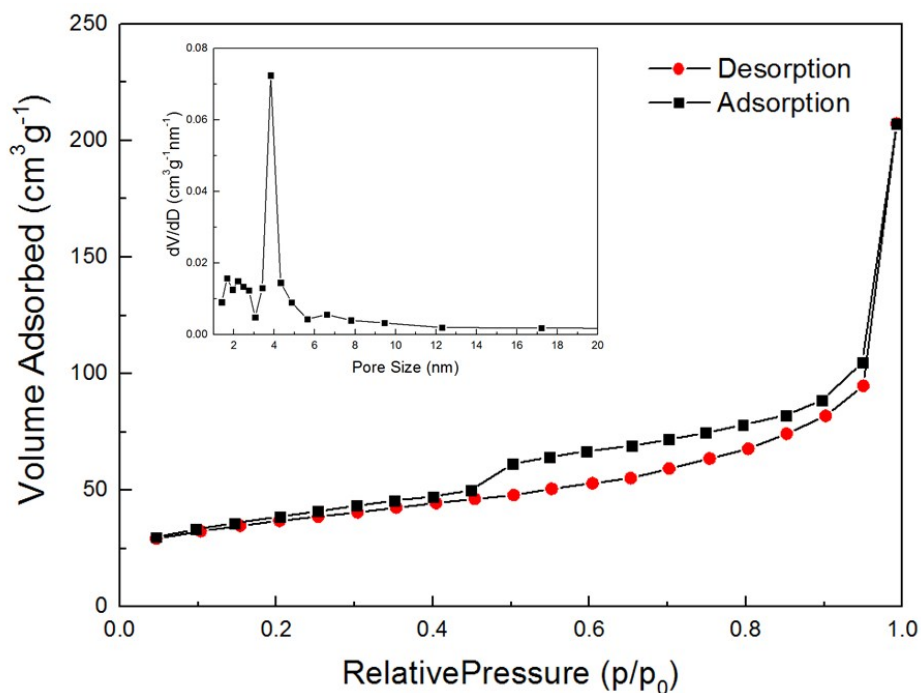

**Figure S6.** N<sub>2</sub> sorption isotherms of LTO-TO-NWs/Sn@C composite.

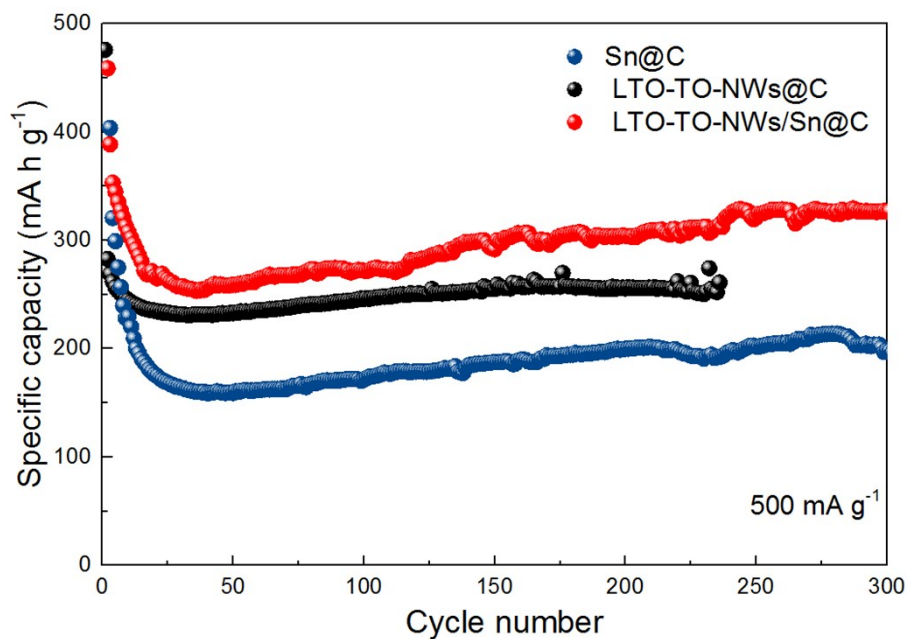

**Figure S7.** Cycling performance of Li<sub>4</sub>Ti<sub>5</sub>O<sub>12</sub>-TiO<sub>2</sub>-NWs@C (LTO-TO-NWs@C), Sn@C and LTO-TO-NWs/Sn@C electrode materials at 500 mA g<sup>-1</sup>. Note that the cycling performance of the three electrodes at 500 mA g<sup>-1</sup> demonstrates that LTO-TO-NWs/Sn@C possesses much higher capacity and better stability than LTO-TO-NWs@C and Sn@C electrodes.

**Table S1.** Comparison of this work with previously reported Ti-based high-capability composites.

| Materials                                                                                                        | Content of high capacity materials (wt %) | Capacity after cycles (mAh g <sup>-1</sup> )     |
|------------------------------------------------------------------------------------------------------------------|-------------------------------------------|--------------------------------------------------|
| <b>N-doped carbon coated Li<sub>4</sub>Ti<sub>5</sub>O<sub>12</sub>-TiO<sub>2</sub>/Sn nanowires (this work)</b> | <b>18 (Sn)</b>                            | <b>360, 600 cycles (1,000 mA g<sup>-1</sup>)</b> |
| Li <sub>4</sub> Ti <sub>5</sub> O <sub>12</sub> -TiO <sub>2</sub> nanowires (comparison)                         | 0                                         | 150, 400 cycles (500 mA g <sup>-1</sup> )        |
| Li <sub>4</sub> Ti <sub>5</sub> O <sub>12</sub> -TiO <sub>2</sub> /Sn nanowires (comparison)                     | 26 (Sn)                                   | 166, 400 cycles (500 mA g <sup>-1</sup> )        |
| N-doped carbon coated Li <sub>4</sub> Ti <sub>5</sub> O <sub>12</sub> -TiO <sub>2</sub> (comparison)             | 0                                         | 230, 240 cycles (500 mA g <sup>-1</sup> )        |
| N-doped carbon coated Sn NPs (comparison)                                                                        | 70 (Sn)                                   | 190, 300 cycles (500 mA g <sup>-1</sup> )        |
| Li <sub>4</sub> Ti <sub>5</sub> O <sub>12</sub> /Sn nano-composite <sup>S1</sup>                                 | 10 (Sn)                                   | 200, 30 cycles (0.02 C)                          |
| Li <sub>4</sub> Ti <sub>5</sub> O <sub>12</sub> /tin phase composite <sup>S2</sup>                               | ~10 (Sn & SnO <sub>2</sub> )              | 224, 50 cycles (100 mA g <sup>-1</sup> )         |
| Li <sub>4</sub> Ti <sub>5</sub> O <sub>12</sub> 2D nanosheets and SnO <sub>2</sub> 0D nanocrystals <sup>S3</sup> | 25 (SnO <sub>2</sub> )                    | 150, 30 cycles (0.1 mA cm <sup>-2</sup> )        |
| Core-shell SnO <sub>2</sub> @Li <sub>4</sub> Ti <sub>5</sub> O <sub>12</sub> <sup>S4</sup>                       | 60 (SnO <sub>2</sub> )                    | 457, 30 cycles (100 mA g <sup>-1</sup> )         |
| Core-shell α-Fe <sub>2</sub> O <sub>3</sub> @ Li <sub>4</sub> Ti <sub>5</sub> O <sub>12</sub> <sup>S5</sup>      | ~30 (α-Fe <sub>2</sub> O <sub>3</sub> )   | 249.3, 30 cycles (100 mA g <sup>-1</sup> )       |
| Li <sub>4</sub> Ti <sub>5</sub> O <sub>12</sub> /NiO nanocomposite <sup>S6</sup>                                 | 5 (NiO)                                   | 176, 100 cycles (1 C)                            |
| Li <sub>4</sub> Ti <sub>5</sub> O <sub>12</sub> /Co <sub>3</sub> O <sub>4</sub> composite <sup>S7</sup>          | 12.5 (Co <sub>3</sub> O <sub>4</sub> )    | ~300, 50 cycles (160 mA g <sup>-1</sup> )        |
| TiO <sub>2</sub> -Sn/C core-shell nanowires arrays <sup>S8</sup>                                                 | 24.8 (Sn)                                 | 459, 160 cycles (335 mA g <sup>-1</sup> )        |
| TiO <sub>2</sub> -Sn@C core-shell microspheres <sup>S9</sup>                                                     | 37.5 (Sn)                                 | 206, 2,000 cycles (500 mA g <sup>-1</sup> )      |
| TiO <sub>2</sub> (B)@SnO <sub>2</sub> / carbon nanowires <sup>S10</sup>                                          | 15 (SnO <sub>2</sub> )                    | 669, 67 cycles (60 mA g <sup>-1</sup> )          |
| SnO <sub>2</sub> @TiO <sub>2</sub> @reduced graphene oxide nanotubes <sup>S11</sup>                              | --(SnO <sub>2</sub> )                     | ~700, 70 cycles (500 mA g <sup>-1</sup> )        |
| SnO <sub>2</sub> /TiO <sub>2</sub> nanocomposite <sup>S12</sup>                                                  | 65 (SnO <sub>2</sub> )                    | ~600, 100 cycles (0.2C)                          |
| SnO <sub>2</sub> @TiO <sub>2</sub> double-shell nanotubes <sup>S13</sup>                                         | ~45 (SnO <sub>2</sub> )                   | 200, 50 cycles (1,500 mA g <sup>-1</sup> )       |



## References

- S1. A. Sivashanmugam, S. Gopukumar, R. Thirunakaran, C. Nithya and S. Prema, *Mater. Res. Bull.*, 2011, **46**, 492-500.
- S2. R. Cai, X. Yu, X. Liu and Z. Shao, *J. Power Sources*, 2010, **195**, 8244-8250.
- S3. S. Y. Han, I. Y. Kim, S. Lee and S. Hwang, *Electrochim. Acta*, 2012, **74**, 59-64.
- S4. G. Ji, Y. Ma, B. Ding and J. Y. Lee, *Chem. Mater.*, 2012, **24**, 3329-3334.
- S5. M. Chen, W. Li, X. Shen and G. Diao, *Acs Appl. Mater. Inter.*, 2014, **6**, 4514-4523.
- S6. C. Zhang, D. Shao, Q. Gao, Y. Lu, Z. Liu, X. Yu, Y. Fang and D. Chen, *J. Solid State Electr.*, 2015, **19**, 1859-1866.
- S7. J. Hong, R. Oh and K. Ryu, *J. Electrochem. Soc.*, 2015, **162**, A1978-A1983.
- S8. J. Liao and A. Manthiram, *Adv. Energy Mater.*, 2014, **4**, 1400403.
- S9. J. Chen, L. Yang, Z. Zhang, S. Fang and S. Hirano, *Chem. Commun.*, 2013, **49**, 2792-2794.
- S10. Z. Yang, G. Du, Z. Guo, X. Yu, Z. Chen, T. Guo and R. Zeng, *Nanoscale*, 2011, **3**, 4440-4447.
- S11. J. Y. Cheong, C. Kim, J. S. Jang and I. Kim, *Rsc Adv.*, 2016, **6**, 2920-2925.
- S12. Y. Lin, R. K. Nagarale, K. C. Klavetter, A. Heller and C. B. Mullins, *J. Mater. Chem.*, 2012, **22**, 11134-11139.
- S13. J. Jeun, K. Park, D. Kim, W. Kim, H. Kim, B. Lee, H. Kim, W. Yu, K. Kang and S. Hong, *Nanoscale*, 2013, **5**, 8480-8483.
